# Supplementary material
Source: Royal Society of Chemistry journal article supplement (https://www.rsc.org/suppdata/dt/1998/2205/c800916.doc)
Supplement: Supplementary file 1 [file c800916.doc]

**Kinetics of Protonation of *cis-*[FeH2(dppe)2]: Formation of the Dihydrogen Complex *trans-*[FeH(H2)(dppe)2]+ (dppe= Ph2PCH2CH2PPh2).**

**Manuel G. Basallote,* Joaquín Durán, M. Jesús Fernández-Trujillo and M. Angeles Máñez.**

Departamento de Ciencia de los Materiales e Ingeniería Metalúrgica y Química Inorgánica. Facultad de Ciencias. Universidad de Cádiz. Apartado 40. Puerto Real 11510. Cádiz. Spain.

**Deposited data.** Table including experimental values of the rate constant for the reaction of *cis-*[FeH2(dppe)2] with acids (3 pages).

**Summary.** Reaction of *cis-*[FeH2(dppe)2] (dppe= Ph2PCH2CH2PPh2) with acids in tetrahydrofuran solution leads to formation of *trans-*[FeH(H2)(dppe)2]+, although co-ordinated H2 is substituted for N2 or the anion of the acid in a slower process. The kinetics of the initial protonation reaction with several acids has been studied using an electrochemical procedure. The protonations are first order with respect to both the iron complex and the acid, with second order rate constants (in dm3 mol-1 s-1) at 25ºC of 9.710-3 (HBF4.Et2O), 1.3910-2 (CF3CO2H), 2.1410-2 (CF3SO3H), 4.810-2 (HCl) and 1.48 10-1 (HBr). The ordering of rate constants within this series of acids is similar to that found for the reaction with *cis-*[FeH2(pp3)] (pp3= P(CH2CH2PPh2)3). Actually, there is a good correlation between the values of log kHX for both complexes, which suggests a common mechanism for the formation of dihydrogen complexes in both cases. Kinetic data show that reactions of the dppe complex with all acids are faster than those of the analogous pp3 compound. The reaction of *cis-*[FeH2(dppe)2] with deuteriated acids DX is faster than with HX, and the values of the kinetic isotope effect (k.i.e*.*), expressed as kHX/kDX, are 0.21 (CF3SO3H), 0.36 (HCl) and 0.55 (HBr). The inverse k.i.e*.* suggests that protonation occurs through a late transition state, and comparison with *cis-*[FeH2(pp3)] and with theoretical values indicates that protonation of *cis-*[FeH2(dppe)2] occurs through a transition state closer to the dihydrogen complex than for the case of the related pp3 compound.

Table 1S.- Observed rate constants for the reaction of *cis-*[FeH2(dppe)2 with an excess of HX or DX. Reactions were carried out under an N2 atmosphere at 25.0ºC in thf solutions containing 0.05 mol dm-3 NBu4BF4. The concentration of iron complex was 2.0 10-5 mol dm-3 unless stated.

| **Acid** | **104[HX]/mol dm-3** | **kobs / s-1** |  | **104[DX]/mol dm-3** | **kobs / s-1** |
| --- | --- | --- | --- | --- | --- |
| **HBF4.Et2O** | 4.05 | 0.029 |  |  |  |
|  | 8.03 | 0.102 |  |  |  |
|  | 15.81 | 0.151 |  |  |  |
|  | 23.33 | 0.256 |  |  |  |
|  | 30.62 | 0.269 |  |  |  |
|  |  |  |  |  |  |
|  | 5.04a | 0.044 |  |  |  |
|  | 10.00a | 0.115 |  |  |  |
|  | 14.88a | 0.124 |  |  |  |
|  | 19.68a | 0.242 |  |  |  |
|  |  |  |  |  |  |
| **CF3CO2H** | 2.16 | 0.043 |  |  |  |
|  | 5.15 | 0.067 |  |  |  |
|  | 7.00 | 0.095 |  |  |  |
|  | 8.74 | 0.123 |  |  |  |
|  | 9.57 | 0.132 |  |  |  |
| **CF3SO3H** | 2.64 | 0.060 |  | 0.87 | 0.080 |
|  | 4.03 | 0.086 |  | 1.70 | 0.233 |
|  | 6.00 | 0.111 |  | 2.51 | 0.284 |
|  | 9.84 | 0.229 |  | 4.04 | 0.414 |
|  | 11.71 | 0.242 |  | 5.46 | 0.534 |
|  |  |  |  |  |  |
| **HCl** | 2.12 | 0.079 |  | 3.89 | 0.503 |
|  | 4.21 | 0.143 |  | 7.58 | 1.10 |
|  | 7.61 | 0.346 |  | 11.44 | 1.31 |
|  | 8.36 | 0.383b |  | 16.58 | 2.01 |
|  | 11.32 | 0.542 |  | 19.00 | 2.56 |
|  | 18.56 | 0.906 |  | 21.56 | 3.06 |
|  |  |  |  |  |  |
| **HBr** | 2.48 | 0.30 |  | 1.09 | 2.24 |
|  | 7.19 | 1.03 |  | 2.14 | 0.54 |
|  | 13.64 | 2.29 |  | 3.14 | 0.55 |
|  | 17.59 | 2.68 |  | 6.28 | 2.06 |
|  | 26.38 | 3.71 |  | 8.23 | 2.13 |
|  |  |  |  |  |  |

a Experiments using 4.0  10-5 mol dm-3 *cis*-[FeH2(dppe)2] in the presence of 0.10 mol dm-3 NBu4BF4.  b The values of kobs for other concentrations of iron complex are 0.384 s-1 for 1.0  10-5 mol dm-3, 0.365 s-1 for 4. 0  10-5 mol dm-3 and 0.388 s-1 for 6. 0  10-5 mol dm-3.
